# Supplementary material for: Trends in Hepatocellular Carcinoma Mortality Rates in the US and Projections Through 2040
Source: PubMed Central journal article supplement (PMC11574689; doi:10.1001/jamanetworkopen.2024.45525), 2024-11-18
Supplement: jamanetwopen-e2445525-s001.pdf [file jamanetwopen-e2445525-s001.pdf]

## Supplementary Online Content

Qiu S, Cai J, Yang Z, et al. Trends in hepatocellular carcinoma mortality rates in the US and projections through 2040. *JAMA Netw Open*. 2024;7(11):e2445525. doi:10.1001/jamanetworkopen.2024.45525

### eMethods

### eReferences

**eTable 1.** *International Statistical Classification of Diseases, Tenth Revision (ICD-10)*, Codes Used in the Study

**eTable 2.** Root Mean Square Error (RMSE) Comparison and Model Selection Between AutoARIMA and Prophet Across Different Groups

**eTable 3.** Characteristics of Hepatocellular Carcinoma (HCC)–Related Deaths in the US, 2006-2022

**eTable 4.** Observed and Projected Age-Standardized Mortality Rates (per 100 000) of Adults (Aged  $\geq 25$  years) With Hepatocellular Carcinoma (HCC), US, 2006-2040, Total and by Sex, Age, and Race and Ethnicity, and Further Stratified by HCC Etiology

**eFigure.** Causes of Deaths Related to Hepatocellular Carcinoma (HCC) Presented by the Age-Standardized Mortality Rate (ASMR) per 100 000 and Predicted Value to 2040, Overall and by Race and Ethnicity

This supplementary material has been provided by the authors to give readers additional information about their work.

## eMethods

The data were obtained from the National Vital Statistics System (NVSS) database. This comprehensive database encompasses more than 99% of deaths of United States residents across the 50 states and the District of Columbia. The database is continually updated and includes records through December 31, 2023. Each entry in the database corresponds to the mortality data of one individual. Pertinent demographic information such as age, sex, race and ethnicity, and etiology of death was extracted for analysis. All causes of death were documented using the 10th edition of the International Classification of Diseases. For the purposes of this study, the etiologies of HCC (C22.0) included HCV infection (B17.1, B18.2), HBV infection (B16, B17.0, B18.0, B18.1), ALD (K70), and MASLD (K75.8, K76.0).

We present the demographic characteristics of deceased individuals with HCC in terms of frequencies and percentages. We utilized the age structure (25 to  $\geq 85$  years) from the 2000 United States Census Standard Population and employed direct standardization to calculate age-standardized mortality rates (ASMRs per 100,000 persons).

We analyzed overall deaths from HCC and further stratified them by subgroup based on etiology (HCV, HBV, ALD, and MAFLD), age (25–64 years and  $\geq 65$  years), sex (male and female), race and ethnicity (Hispanic, non-Hispanic [NH]-White, NH-Black, NH-Asian including Pacific Islander, and NH-American Indian [AI]/Alaska Native [AN]) for analysis.

We employed the Joinpoint regression program to explore the trend in mortality rates among individuals with HCC, in order to analyze the annual percentage change (APC) and 95% confidence intervals (CIs) of age-standardized rates. The positivity/negativity and magnitude of APCs signify the direction and degree of trend changes. AutoARIMA is a widely used traditional time series prediction statistical model,<sup>[1, 2]</sup> and Prophet is an open source time series prediction statistical model developed by the Facebook team<sup>[3]</sup>. Both models are suitable for large-scale time series data prediction and analysis.

Auto Regressive Integrated Moving Average (ARIMA) technique is one of the commonly used approaches for time series investigation. The model captures the linear dependence and random volatility of the time series by combining three parts: autoregression (AR), difference (I) and moving average (MA). The AR section of the ARIMA model indicates that the current observation can be explained by a linear combination of its past values, represented as AR(p):

$$Y_t = \delta + \varphi_1 Y_{t-1} + \varphi_2 Y_{t-2} + \dots + \varphi_p Y_{t-p} + \varepsilon_t$$

here,  $Y_t$  represents the value of the time series at time  $t$ ,  $p$  is the order of the autoregressive term,  $\varphi_1, \varphi_2, \dots, \varphi_p$ , are the autoregressive coefficients of the model,  $\delta$  is the constant term, and  $\varepsilon_t$  is the error term at time  $t$ . The MA section of the ARIMA model indicates that the current observation is not only affected by the previous autoregressive part, but also by the linear combination of past random error terms, denoted as MA(q):

$$Y_t = \mu + \varepsilon_t + \theta_1\varepsilon_{t-1} + \theta_2\varepsilon_{t-2} + \dots + \theta_q\varepsilon_{t-q}$$

here,  $\mu$  is the expected value of the time series,  $\theta_1, \theta_2, \dots, \theta_q$  are the sliding average coefficients, and  $q$  is the order of the sliding average term. Difference is used to deal with the non-stationarity of time series. Non-stationarity is usually manifested as the mean and variance of the time series changing over time. By performing a difference operation on the time series, the non-stationarity can be eliminated and a stationary series can be obtained. The mathematical expression of the difference operation is:

$$\Delta Y_t = Y_t - Y_{t-1} = Y_t - LY_t$$

So the expression of the ARIMA (p, d, q) model is:

$$(1 - \varphi_1L - \varphi_1L^2 - \dots - \varphi_pL^p)\Delta^d Y_t = \delta + \varepsilon_t + \theta_1\varepsilon_{t-1} + \theta_2\varepsilon_{t-2} + \dots + \theta_q\varepsilon_{t-q}$$

The AutoARIMA model is an automated extension of the ARIMA model that simplifies the model selection process. When using the R package for AutoARIMA modeling, the model order selection is usually based on a unit root test to determine the number of differences (d), and combined with information criteria (such as AIC) to optimize the model's autoregressive (p) and moving average (q) orders, using a step-wise procedure to traverse the model space, by gradually increasing or decreasing model parameters, to find the optimal model, thereby achieving a balance between accuracy and complexity. This approach greatly simplifies the model selection process while ensuring that the selected model can fit the data well.

During the modeling process, Prophet model decomposes time series data into multiple modules such as trend items, seasonal items, and holiday effects based on an additive model. After fitting each module, the predicted values of each module are combined based on the generalized additive model to obtain the prediction results of future time series, and provide a confidence interval for each predicted value to evaluate the reliability of the prediction results. Its algorithm model can be simply expressed as:

$$y(t) = g(t) + s(t) + h(t) + \varepsilon_t$$

here,  $g(t)$  represents the trend term of the time series,  $s(t)$  represents the seasonal term,  $h(t)$  represents the holiday term, and  $\varepsilon_t$  represents the error term, which is usually assumed to follow a normal distribution. This is an additive form based on the decomposition method. Another form is a multiplicative form based on the decomposition method, which can be expressed as

$$y(t) = g(t) \times s(t) \times h(t) \times \varepsilon_t$$

Simply take the logarithm of the variables on both sides to convert the multiplicative form to the additive form.

We compared the root mean squared error (RMSE) of the two models to select the appropriate forecasting model. For HCV data, due to the shorter duration and fewer data

points (starting from 2015), after selecting the forecasting model based on Root Mean Squared Error (RMSE) values, the forecast end year was chosen before the first negative value. If the AutoARIMA model is selected for prediction, we will perform a Ljung-Box test on its residuals. If the p-value of the Ljung-Box test is greater than 0.05, it means that the model fits the data well, that is, the residuals of the model appear as white noise, indicating that the model effectively captures the main structure of the data. RMSE is defined as:

$$RMSE = \sqrt{\frac{1}{n} \sum_{i=1}^n (\hat{y}_i - y_i)^2}$$

The National Cancer Institute's Joinpoint Trend Analysis software version 5.0.2 and R 4.0.2 statistical software were used in this study. The significance threshold for two-sided p-values was set at 0.05.

## eReferences

- 1.Box GEP. and Jenkins GM. (1970) Time series analysis: Forecasting and control. Holden-Day, San Francisco.
- 2.Hyndman R J, Khandakar Y. Automatic time series forecasting: the forecast package for R. Journal of statistical software, 2008, 27: 1-22.
- 3.Taylor SJ, Letham B. Forecasting at scale. The American Statistician, 2018, 72(1): 37-45.

**eTable 1.** *International Statistical Classification of Diseases, Tenth Revision (ICD-10), Codes Used in the Study*

| <b>Disease</b>      | <b>ICD-10</b>                                   |
|---------------------|-------------------------------------------------|
| <b>Liver Cancer</b> | C22.0                                           |
| <b>ALD</b>          | K70.0, K70.1, K70.2, K70.3, K70.4, K70.9        |
| <b>MASLD</b>        | K75.8, K76.0                                    |
| <b>HCV</b>          | B17.1, B18.2                                    |
| <b>HBV</b>          | B16.0, B16.1, B16.2, B16.9, B17.0, B18.0, B18.1 |

Note: ALD, alcohol-associated liver disease; MASLD, metabolic dysfunction-associated steatotic liver disease; HCV, hepatitis C virus; HBV, hepatitis B virus.

**eTable 2.** Root Mean Square Error (RMSE) Comparison and Model Selection Between AutoARIMA and Prophet Across Different Groups

| Group          |          | RMSE      |         | Choice      |
|----------------|----------|-----------|---------|-------------|
|                |          | AutoARIMA | Prophet |             |
| <b>Overall</b> |          |           |         |             |
|                | Overall  | 0.09      | 0.07    | Prophet     |
|                | HCV      | 0.02      | 0.01    | Prophet     |
|                | ALD      | 0.03      | 0.02    | Prophet     |
|                | HBV      | 0.02      | 0.02    | Prophet     |
|                | MASLD    | 0.01      | 0.01    | AutoARIMA** |
| <b>Sex</b>     |          |           |         |             |
| Female         | Overall  | 0.06      | 0.04    | Prophet     |
|                | HCV      | 0.02      | 0.01    | Prophet     |
|                | ALD      | 0.01      | 0.01    | Prophet     |
|                | HBV      | 0.01      | 0.01    | Prophet     |
|                | MASLD    | 0.01      | 0.01    | Prophet     |
| Male           | Overall  | 0.14      | 0.13    | Prophet     |
|                | HCV      | 0.03      | 0.00    | Prophet     |
|                | ALD      | 0.06      | 0.04    | Prophet     |
|                | HBV      | 0.02      | 0.02    | Prophet     |
|                | MASLD    | 0.01      | 0.01    | AutoARIMA** |
| <b>Age</b>     |          |           |         |             |
| 25-64 years    | Overall* | 0.08      | 0.23    | Prophet     |
|                | HCV      | 0.03      | 0.02    | Prophet     |
|                | ALD      | 0.04      | 0.03    | Prophet     |
|                | HBV      | 0.02      | 0.02    | Prophet     |
|                | MASLD    | 0.00      | 0.00    | Prophet     |
|                | Overall  | 0.35      | 0.17    | Prophet     |

|           |         |      |      |             |
|-----------|---------|------|------|-------------|
| ≥65 years | HCV     | 0.07 | 0.03 | Prophet     |
|           | ALD     | 0.05 | 0.03 | Prophet     |
|           | HBV     | 0.02 | 0.02 | Prophet     |
|           | MASLD   | 0.04 | 0.04 | AutoARIMA** |
| Ethnicity |         |      |      |             |
| Hispanics | Overall | 0.42 | 0.29 | Prophet     |
|           | HCV     | 0.14 | 0.08 | Prophet     |
|           | ALD     | 0.06 | 0.05 | Prophet     |
|           | MASLD   | 0.04 | 0.02 | Prophet     |
| NH-AI/AN  | Overall | 0.67 | 0.58 | Prophet     |
|           | HCV     | 0.39 | 0.38 | Prophet     |
|           | ALD     | 0.27 | 0.18 | Prophet     |
| NH-Asians | Overall | 0.35 | 0.27 | Prophet     |
|           | HCV     | 0.14 | 0.07 | Prophet     |
|           | ALD     | 0.04 | 0.02 | Prophet     |
|           | HBV     | 0.19 | 0.18 | Prophet     |
| NH-Blacks | Overall | 0.30 | 0.24 | Prophet     |
|           | HCV     | 0.16 | 0.09 | Prophet     |
|           | ALD     | 0.06 | 0.04 | Prophet     |
|           | HBV     | 0.02 | 0.02 | Prophet     |
| NH-Whites | Overall | 0.05 | 0.05 | Prophet     |
|           | HCV     | 0.05 | 0.00 | Prophet     |
|           | ALD     | 0.02 | 0.02 | Prophet     |
|           | HBV     | 0.01 | 0.01 | AutoARIMA** |
|           | MASLD   | 0.01 | 0.01 | AutoARIMA** |

\*: Considering the 95% confidence interval, the overall trend, and the fact that the RMSE is not much different, this group uses Prophet with a larger RMSE.

\*\* : The AutoARIMA model was selected for prediction, and the p values of the Ljung-Box residual test were all greater than 0.05, indicating that the model fit well and the residuals had no significant autocorrelation.



**eTable 3.** Characteristics of Hepatocellular Carcinoma (HCC)–Related Deaths in the US, 2006-2022

| Characteristic      | Deaths          |               |               |                |                |                |
|---------------------|-----------------|---------------|---------------|----------------|----------------|----------------|
|                     | 2006 to 2022    | 2006          | 2010          | 2015           | 2020           | 2022           |
| <b>Overall</b>      | 188,280 (100.0) | 7,425 (100.0) | 9,262 (100.0) | 11,264 (100.0) | 13,907 (100.0) | 14,310 (100.0) |
| <b>Sex</b>          |                 |               |               |                |                |                |
| Female              | 42,500 (22.6)   | 1,765 (23.8)  | 2,022 (21.8)  | 2,439 (21.6)   | 3,337 (24.0)   | 3,510 (24.5)   |
| Male                | 145,780 (77.4)  | 5,660 (76.2)  | 7,240 (78.2)  | 8,825 (78.4)   | 10,570 (76.0)  | 10,800 (75.5)  |
| <b>Age in years</b> |                 |               |               |                |                |                |
| 25-64               | 83,488 (44.4)   | 3,641 (49.0)  | 4,838 (52.2)  | 5,533 (49.1)   | 4,697 (33.8)   | 4,157 (29.1)   |
| ≥65                 | 104,792 (55.6)  | 3,784 (51.0)  | 4,424 (47.8)  | 5,731 (50.9)   | 9,210 (66.2)   | 10,153 (70.9)  |
| <b>Etiology</b>     |                 |               |               |                |                |                |
| HCV                 | 42,111 (65.6)   | 1,269 (74.2)  | 2,211 (69.7)  | 3,052 (69.5)   | 2,615 (57.4)   | 2,319 (54.0)   |
| ALD                 | 14,176 (22.0)   | 201 (11.7)    | 578 (18.2)    | 876 (20.0)     | 1,270 (27.9)   | 1,281 (29.8)   |
| HBV                 | 5,369 (8.4)     | 228 (13.3)    | 338 (10.7)    | 329 (7.5)      | 315 (6.9)      | 317 (7.4)      |
| MASLD               | 2,550 (4.0)     | 13 (0.8)      | 43 (1.4)      | 133 (3.0)      | 358 (7.8)      | 379 (8.8)      |

Data are *n* (%). Note: ALD, alcohol-associated liver disease; MASLD, metabolic dysfunction-associated steatotic liver disease; HCV, hepatitis C virus; HBV, hepatitis B virus.

**eTable 4.** Observed and Projected Age-Standardized Mortality Rates (per 100 000) of Adults (Aged ≥25 years) With Hepatocellular Carcinoma (HCC), US, 2006-2040, Total and by Sex, Age, and Race and Ethnicity, and Further Stratified by HCC Etiology

| Study Period    |                  | Etiology       |             |            |            |              |      |
|-----------------|------------------|----------------|-------------|------------|------------|--------------|------|
|                 |                  | <i>Overall</i> | <i>HCV*</i> | <i>ALD</i> | <i>HBV</i> | <i>MASLD</i> |      |
| <b>Overall</b>  |                  |                |             |            |            |              |      |
| <b>Observed</b> | 2006             | 3.65           | 0.61        | 0.09       | 0.12       | 0.01         |      |
|                 | 2007             | 3.65           | 0.77        | 0.18       | 0.13       | 0.01         |      |
|                 | 2008             | 3.88           | 0.85        | 0.20       | 0.11       | 0.02         |      |
|                 | 2009             | 4.06           | 0.91        | 0.21       | 0.15       | 0.01         |      |
|                 | 2010             | 4.12           | 0.95        | 0.23       | 0.15       | 0.02         |      |
|                 | 2011             | 4.26           | 0.99        | 0.26       | 0.14       | 0.02         |      |
|                 | 2012             | 4.27           | 1.10        | 0.30       | 0.14       | 0.03         |      |
|                 | 2013             | 4.31           | 1.11        | 0.25       | 0.17       | 0.04         |      |
|                 | 2014             | 4.32           | 1.07        | 0.30       | 0.16       | 0.03         |      |
|                 | 2015             | 4.39           | 1.12        | 0.33       | 0.13       | 0.05         |      |
|                 | 2016             | 4.70           | 1.11        | 0.36       | 0.14       | 0.06         |      |
|                 | 2017             | 4.77           | 1.06        | 0.40       | 0.15       | 0.07         |      |
|                 | 2018             | 4.86           | 0.97        | 0.41       | 0.12       | 0.08         |      |
|                 | 2019             | 4.80           | 0.93        | 0.42       | 0.12       | 0.09         |      |
|                 | 2020             | 4.91           | 0.87        | 0.44       | 0.10       | 0.11         |      |
|                 | 2021             | 4.94           | 0.79        | 0.43       | 0.12       | 0.10         |      |
|                 | 2022             | 5.03           | 0.76        | 0.43       | 0.10       | 0.14         |      |
|                 | <b>Projected</b> | 2023           | 5.11        | 0.69       | 0.50       | 0.12         | 0.13 |
|                 |                  | 2024           | 5.22        | 0.64       | 0.53       | 0.11         | 0.15 |
| 2025            |                  | 5.31           | 0.57        | 0.52       | 0.13       | 0.15         |      |
| 2026            |                  | 5.33           | 0.51        | 0.55       | 0.12       | 0.16         |      |
| 2027            |                  | 5.40           | 0.45        | 0.58       | 0.11       | 0.17         |      |

|                 |      |      |      |      |      |      |
|-----------------|------|------|------|------|------|------|
|                 | 2028 | 5.52 | 0.40 | 0.61 | 0.10 | 0.17 |
|                 | 2029 | 5.60 | 0.33 | 0.60 | 0.12 | 0.18 |
|                 | 2030 | 5.62 | 0.27 | 0.63 | 0.11 | 0.19 |
|                 | 2031 | 5.69 | 0.21 | 0.66 | 0.10 | 0.20 |
|                 | 2032 | 5.81 | 0.17 | 0.69 | 0.09 | 0.20 |
|                 | 2033 | 5.89 | 0.10 | 0.68 | 0.12 | 0.21 |
|                 | 2034 | 5.92 | 0.03 | 0.71 | 0.11 | 0.22 |
|                 | 2035 | 5.99 | -    | 0.74 | 0.10 | 0.23 |
|                 | 2036 | 6.10 | -    | 0.78 | 0.09 | 0.23 |
|                 | 2037 | 6.18 | -    | 0.77 | 0.11 | 0.24 |
|                 | 2038 | 6.21 | -    | 0.79 | 0.10 | 0.25 |
|                 | 2039 | 6.28 | -    | 0.82 | 0.09 | 0.26 |
|                 | 2040 | 6.39 | -    | 0.86 | 0.08 | 0.26 |
| <b>Sex</b>      |      |      |      |      |      |      |
| Female          |      |      |      |      |      |      |
| <b>Observed</b> | 2006 | 1.59 | 0.23 | 0.01 | 0.02 | NA   |
|                 | 2007 | 1.53 | 0.24 | 0.05 | 0.04 | 0.01 |
|                 | 2008 | 1.58 | 0.25 | 0.04 | 0.04 | 0.02 |
|                 | 2009 | 1.67 | 0.31 | 0.05 | 0.02 | 0.01 |
|                 | 2010 | 1.66 | 0.33 | 0.04 | 0.03 | 0.02 |
|                 | 2011 | 1.73 | 0.35 | 0.05 | 0.05 | 0.02 |
|                 | 2012 | 1.72 | 0.37 | 0.04 | 0.05 | 0.03 |
|                 | 2013 | 1.80 | 0.40 | 0.04 | 0.05 | 0.02 |
|                 | 2014 | 1.77 | 0.36 | 0.05 | 0.04 | 0.03 |
|                 | 2015 | 1.79 | 0.36 | 0.06 | 0.04 | 0.04 |
|                 | 2016 | 2.00 | 0.36 | 0.07 | 0.04 | 0.04 |
|                 | 2017 | 1.95 | 0.33 | 0.08 | 0.04 | 0.04 |

|                  |      |      |      |      |      |      |
|------------------|------|------|------|------|------|------|
|                  | 2018 | 2.00 | 0.29 | 0.09 | 0.02 | 0.06 |
|                  | 2019 | 2.01 | 0.30 | 0.09 | 0.03 | 0.07 |
|                  | 2020 | 2.18 | 0.32 | 0.08 | 0.04 | 0.09 |
|                  | 2021 | 2.19 | 0.30 | 0.11 | 0.04 | 0.08 |
|                  | 2022 | 2.33 | 0.28 | 0.09 | 0.04 | 0.11 |
| <b>Projected</b> | 2023 | 2.31 | 0.27 | 0.10 | 0.04 | 0.10 |
|                  | 2024 | 2.39 | 0.28 | 0.11 | 0.05 | 0.11 |
|                  | 2025 | 2.45 | 0.25 | 0.11 | 0.04 | 0.10 |
|                  | 2026 | 2.49 | 0.24 | 0.12 | 0.04 | 0.12 |
|                  | 2027 | 2.54 | 0.24 | 0.12 | 0.04 | 0.13 |
|                  | 2028 | 2.62 | 0.24 | 0.12 | 0.05 | 0.14 |
|                  | 2029 | 2.68 | 0.21 | 0.13 | 0.04 | 0.13 |
|                  | 2030 | 2.72 | 0.20 | 0.14 | 0.04 | 0.14 |
|                  | 2031 | 2.78 | 0.20 | 0.14 | 0.05 | 0.15 |
|                  | 2032 | 2.86 | 0.20 | 0.14 | 0.05 | 0.16 |
|                  | 2033 | 2.92 | 0.17 | 0.15 | 0.04 | 0.16 |
|                  | 2034 | 2.96 | 0.16 | 0.16 | 0.04 | 0.17 |
|                  | 2035 | 3.02 | 0.16 | 0.16 | 0.05 | 0.18 |
|                  | 2036 | 3.09 | 0.16 | 0.16 | 0.05 | 0.19 |
|                  | 2037 | 3.15 | 0.13 | 0.17 | 0.04 | 0.18 |
|                  | 2038 | 3.19 | 0.12 | 0.17 | 0.05 | 0.19 |
|                  | 2039 | 3.25 | 0.12 | 0.18 | 0.05 | 0.20 |
|                  | 2040 | 3.33 | 0.12 | 0.18 | 0.05 | 0.21 |
| <b>Male</b>      |      |      |      |      |      |      |
| <b>Observed</b>  | 2006 | 6.10 | 1.00 | 0.16 | 0.20 | 0.01 |
|                  | 2007 | 6.18 | 1.30 | 0.38 | 0.26 | 0.02 |
|                  | 2008 | 6.57 | 1.45 | 0.38 | 0.23 | 0.02 |

|                  |      |      |      |      |      |      |
|------------------|------|------|------|------|------|------|
|                  | 2009 | 6.82 | 1.55 | 0.37 | 0.25 | 0.02 |
|                  | 2010 | 7.01 | 1.59 | 0.46 | 0.27 | 0.02 |
|                  | 2011 | 7.16 | 1.69 | 0.49 | 0.24 | 0.03 |
|                  | 2012 | 7.15 | 1.86 | 0.54 | 0.24 | 0.05 |
|                  | 2013 | 7.18 | 1.87 | 0.51 | 0.25 | 0.05 |
|                  | 2014 | 7.20 | 1.90 | 0.62 | 0.25 | 0.05 |
|                  | 2015 | 7.37 | 1.96 | 0.62 | 0.25 | 0.06 |
|                  | 2016 | 7.85 | 1.92 | 0.73 | 0.21 | 0.08 |
|                  | 2017 | 8.01 | 1.86 | 0.76 | 0.23 | 0.10 |
|                  | 2018 | 8.08 | 1.75 | 0.78 | 0.21 | 0.11 |
|                  | 2019 | 8.02 | 1.61 | 0.80 | 0.24 | 0.11 |
|                  | 2020 | 8.06 | 1.47 | 0.83 | 0.22 | 0.15 |
|                  | 2021 | 8.10 | 1.36 | 0.80 | 0.20 | 0.18 |
|                  | 2022 | 8.15 | 1.28 | 0.82 | 0.21 | 0.16 |
| <b>Projected</b> | 2023 | 8.30 | 1.18 | 0.95 | 0.22 | 0.17 |
|                  | 2024 | 8.45 | 1.07 | 1.01 | 0.21 | 0.18 |
|                  | 2025 | 8.53 | 0.96 | 0.99 | 0.21 | 0.19 |
|                  | 2026 | 8.55 | 0.88 | 1.05 | 0.21 | 0.19 |
|                  | 2027 | 8.64 | 0.79 | 1.11 | 0.21 | 0.20 |
|                  | 2028 | 8.78 | 0.68 | 1.17 | 0.20 | 0.21 |
|                  | 2029 | 8.86 | 0.57 | 1.15 | 0.21 | 0.22 |
|                  | 2030 | 8.88 | 0.49 | 1.20 | 0.20 | 0.23 |
|                  | 2031 | 8.97 | 0.39 | 1.26 | 0.20 | 0.24 |
|                  | 2032 | 9.11 | 0.28 | 1.32 | 0.20 | 0.25 |
|                  | 2033 | 9.20 | 0.17 | 1.30 | 0.20 | 0.26 |
|                  | 2034 | 9.22 | 0.09 | 1.36 | 0.20 | 0.27 |
|                  | 2035 | 9.30 | -    | 1.42 | 0.19 | 0.28 |

|                 |                  |      |      |      |      |      |
|-----------------|------------------|------|------|------|------|------|
|                 | 2036             | 9.45 | -    | 1.48 | 0.19 | 0.29 |
|                 | 2037             | 9.53 | -    | 1.46 | 0.19 | 0.30 |
|                 | 2038             | 9.55 | -    | 1.51 | 0.19 | 0.31 |
|                 | 2039             | 9.63 | -    | 1.57 | 0.18 | 0.31 |
|                 | 2040             | 9.78 | -    | 1.63 | 0.18 | 0.32 |
| <b>Age</b>      |                  |      |      |      |      |      |
| 25-64 years     |                  |      |      |      |      |      |
| <b>Observed</b> | 2006             | 2.06 | 0.55 | 0.06 | 0.09 | NA   |
|                 | 2007             | 2.12 | 0.71 | 0.16 | 0.11 | NA   |
|                 | 2008             | 2.28 | 0.78 | 0.17 | 0.08 | NA   |
|                 | 2009             | 2.45 | 0.83 | 0.18 | 0.12 | NA   |
|                 | 2010             | 2.43 | 0.88 | 0.23 | 0.12 | 0.01 |
|                 | 2011             | 2.60 | 0.92 | 0.21 | 0.12 | 0.01 |
|                 | 2012             | 2.61 | 0.99 | 0.25 | 0.12 | 0.01 |
|                 | 2013             | 2.60 | 0.99 | 0.20 | 0.15 | 0.01 |
|                 | 2014             | 2.53 | 0.92 | 0.25 | 0.13 | 0.01 |
|                 | 2015             | 2.51 | 0.91 | 0.26 | 0.10 | 0.02 |
|                 | 2016             | 2.54 | 0.90 | 0.28 | 0.10 | 0.02 |
|                 | 2017             | 2.46 | 0.79 | 0.30 | 0.12 | 0.02 |
|                 | 2018             | 2.36 | 0.68 | 0.30 | 0.08 | 0.02 |
|                 | 2019             | 2.16 | 0.61 | 0.31 | 0.08 | 0.03 |
|                 | 2020             | 2.07 | 0.51 | 0.28 | 0.08 | 0.03 |
|                 | <b>Projected</b> | 2021 | 1.95 | 0.42 | 0.27 | 0.08 |
| 2022            |                  | 1.79 | 0.37 | 0.26 | 0.08 | 0.03 |
| 2023            |                  | 2.17 | 0.27 | 0.34 | 0.08 | 0.04 |
|                 | 2024             | 2.18 | 0.20 | 0.36 | 0.07 | 0.04 |
|                 | 2025             | 2.13 | 0.10 | 0.34 | 0.10 | 0.04 |

|                  |      |       |      |      |      |      |
|------------------|------|-------|------|------|------|------|
|                  | 2026 | 2.11  | 0.01 | 0.36 | 0.09 | 0.04 |
|                  | 2027 | 2.10  | -    | 0.38 | 0.08 | 0.05 |
|                  | 2028 | 2.11  | -    | 0.40 | 0.07 | 0.05 |
|                  | 2029 | 2.06  | -    | 0.38 | 0.09 | 0.05 |
|                  | 2030 | 2.04  | -    | 0.40 | 0.08 | 0.05 |
|                  | 2031 | 2.03  | -    | 0.42 | 0.07 | 0.05 |
|                  | 2032 | 2.04  | -    | 0.44 | 0.06 | 0.06 |
|                  | 2033 | 1.99  | -    | 0.43 | 0.08 | 0.06 |
|                  | 2034 | 1.97  | -    | 0.45 | 0.07 | 0.06 |
|                  | 2035 | 1.96  | -    | 0.47 | 0.06 | 0.06 |
|                  | 2036 | 1.97  | -    | 0.48 | 0.05 | 0.07 |
|                  | 2037 | 1.92  | -    | 0.47 | 0.08 | 0.07 |
|                  | 2038 | 1.90  | -    | 0.49 | 0.06 | 0.07 |
|                  | 2039 | 1.89  | -    | 0.51 | 0.06 | 0.07 |
|                  | 2040 | 1.90  | -    | 0.53 | 0.05 | 0.08 |
| <b>≥65 years</b> |      |       |      |      |      |      |
| <b>Observed</b>  | 2006 | 10.20 | 0.86 | 0.23 | 0.22 | NA   |
|                  | 2007 | 9.95  | 0.99 | 0.28 | 0.26 | 0.03 |
|                  | 2008 | 10.44 | 1.15 | 0.38 | 0.23 | 0.07 |
|                  | 2009 | 10.71 | 1.24 | 0.32 | 0.25 | 0.05 |
|                  | 2010 | 11.08 | 1.22 | 0.30 | 0.29 | 0.07 |
|                  | 2011 | 11.08 | 1.28 | 0.44 | 0.24 | 0.08 |
|                  | 2012 | 11.08 | 1.59 | 0.49 | 0.26 | 0.10 |
|                  | 2013 | 11.39 | 1.62 | 0.46 | 0.23 | 0.14 |
|                  | 2014 | 11.71 | 1.69 | 0.52 | 0.28 | 0.15 |
|                  | 2015 | 12.15 | 1.98 | 0.62 | 0.25 | 0.19 |
|                  | 2016 | 13.58 | 1.98 | 0.70 | 0.26 | 0.26 |

|                         |      |       |      |      |      |      |
|-------------------------|------|-------|------|------|------|------|
|                         | 2017 | 14.28 | 2.15 | 0.81 | 0.26 | 0.29 |
|                         | 2018 | 15.14 | 2.16 | 0.86 | 0.23 | 0.36 |
|                         | 2019 | 15.68 | 2.28 | 0.93 | 0.30 | 0.41 |
|                         | 2020 | 16.59 | 2.32 | 1.06 | 0.28 | 0.50 |
|                         | 2021 | 17.25 | 2.32 | 1.10 | 0.25 | 0.46 |
|                         | 2022 | 18.37 | 2.34 | 1.14 | 0.28 | 0.56 |
| <b>Projected</b>        | 2023 | 19.02 | 2.39 | 1.24 | 0.28 | 0.59 |
|                         | 2024 | 19.81 | 2.42 | 1.35 | 0.28 | 0.63 |
|                         | 2025 | 20.71 | 2.47 | 1.39 | 0.27 | 0.66 |
|                         | 2026 | 21.49 | 2.49 | 1.46 | 0.28 | 0.70 |
|                         | 2027 | 22.27 | 2.52 | 1.55 | 0.29 | 0.73 |
|                         | 2028 | 23.06 | 2.55 | 1.66 | 0.29 | 0.77 |
|                         | 2029 | 23.96 | 2.60 | 1.69 | 0.28 | 0.80 |
|                         | 2030 | 24.74 | 2.63 | 1.76 | 0.29 | 0.84 |
|                         | 2031 | 25.52 | 2.66 | 1.85 | 0.30 | 0.87 |
|                         | 2032 | 26.31 | 2.69 | 1.97 | 0.30 | 0.91 |
|                         | 2033 | 27.21 | 2.73 | 2.00 | 0.29 | 0.94 |
|                         | 2034 | 27.99 | 2.76 | 2.07 | 0.30 | 0.98 |
|                         | 2035 | 28.77 | 2.79 | 2.16 | 0.31 | 1.01 |
|                         | 2036 | 29.56 | 2.82 | 2.27 | 0.31 | 1.05 |
|                         | 2037 | 30.46 | 2.87 | 2.30 | 0.30 | 1.08 |
|                         | 2038 | 31.24 | 2.90 | 2.37 | 0.31 | 1.12 |
|                         | 2039 | 32.02 | 2.93 | 2.47 | 0.32 | 1.15 |
|                         | 2040 | 32.81 | 2.95 | 2.58 | 0.32 | 1.19 |
| <b><i>Ethnicity</i></b> |      |       |      |      |      |      |
| Hispanics               |      |       |      |      |      |      |
| <b>Observed</b>         | 2006 | 6.49  | 1.08 | 0.25 | NA   | NA   |



|                  |      |      |      |      |    |      |
|------------------|------|------|------|------|----|------|
|                  | 2007 | 5.89 | 1.29 | 0.40 | NA | NA   |
|                  | 2008 | 6.35 | 1.42 | 0.45 | NA | NA   |
|                  | 2009 | 6.61 | 1.42 | 0.52 | NA | NA   |
|                  | 2010 | 6.44 | 1.47 | 0.46 | NA | NA   |
|                  | 2011 | 6.87 | 1.61 | 0.55 | NA | NA   |
|                  | 2012 | 6.88 | 1.79 | 0.64 | NA | 0.08 |
|                  | 2013 | 6.78 | 1.73 | 0.61 | NA | 0.07 |
|                  | 2014 | 6.35 | 1.61 | 0.71 | NA | 0.07 |
|                  | 2015 | 6.39 | 1.56 | 0.75 | NA | 0.14 |
|                  | 2016 | 7.32 | 1.65 | 0.81 | NA | 0.09 |
|                  | 2017 | 7.25 | 1.50 | 0.89 | NA | 0.12 |
|                  | 2018 | 7.68 | 1.51 | 0.81 | NA | 0.17 |
|                  | 2019 | 6.99 | 1.25 | 0.87 | NA | 0.17 |
|                  | 2020 | 7.18 | 1.09 | 0.83 | NA | 0.16 |
| <b>Projected</b> | 2021 | 7.49 | 1.14 | 0.98 | NA | 0.18 |
|                  | 2022 | 7.44 | 1.01 | 1.01 | NA | 0.20 |
|                  | 2023 | 7.48 | 0.89 | 1.05 | NA | 0.22 |
|                  | 2024 | 7.62 | 0.76 | 1.10 | NA | 0.23 |
|                  | 2025 | 7.80 | 0.75 | 1.15 | NA | 0.24 |
|                  | 2026 | 7.75 | 0.62 | 1.18 | NA | 0.25 |
|                  | 2027 | 7.79 | 0.50 | 1.22 | NA | 0.27 |
|                  | 2028 | 7.93 | 0.37 | 1.27 | NA | 0.28 |
|                  | 2029 | 8.11 | 0.36 | 1.32 | NA | 0.29 |
|                  | 2030 | 8.06 | 0.23 | 1.35 | NA | 0.31 |
|                  | 2031 | 8.10 | 0.11 | 1.39 | NA | 0.32 |
|                  | 2032 | 8.24 | -    | 1.43 | NA | 0.33 |
|                  | 2033 | 8.42 | -    | 1.48 | NA | 0.34 |

|                  |      |       |      |      |    |      |
|------------------|------|-------|------|------|----|------|
|                  | 2034 | 8.37  | -    | 1.51 | NA | 0.36 |
|                  | 2035 | 8.41  | -    | 1.55 | NA | 0.37 |
|                  | 2036 | 8.55  | -    | 1.60 | NA | 0.39 |
|                  | 2037 | 8.73  | -    | 1.65 | NA | 0.39 |
|                  | 2038 | 8.68  | -    | 1.68 | NA | 0.41 |
|                  | 2039 | 8.72  | -    | 1.72 | NA | 0.43 |
|                  | 2040 | 8.86  | -    | 1.77 | NA | 0.44 |
| <b>NH-AI/AN</b>  |      |       |      |      |    |      |
| <b>Observed</b>  | 2006 | 5.46  | NA   | NA   | NA | NA   |
|                  | 2007 | 6.49  | 1.01 | NA   | NA | NA   |
|                  | 2008 | 5.81  | 1.79 | NA   | NA | NA   |
|                  | 2009 | 5.31  | 1.05 | NA   | NA | NA   |
|                  | 2010 | 7.47  | 1.64 | 0.81 | NA | NA   |
|                  | 2011 | 6.01  | 1.51 | 0.65 | NA | NA   |
|                  | 2012 | 8.13  | 1.78 | 0.75 | NA | NA   |
|                  | 2013 | 7.80  | 2.12 | 0.58 | NA | NA   |
|                  | 2014 | 6.90  | 1.81 | 1.27 | NA | NA   |
|                  | 2015 | 7.92  | 2.34 | 0.84 | NA | NA   |
|                  | 2016 | 8.60  | 1.81 | 1.38 | NA | NA   |
|                  | 2017 | 8.39  | 1.93 | 0.91 | NA | NA   |
|                  | 2018 | 8.57  | 1.95 | 1.30 | NA | NA   |
|                  | 2019 | 8.37  | 1.26 | 1.58 | NA | NA   |
| 2020             | 9.88 | 2.47  | 1.69 | NA   | NA |      |
| <b>Projected</b> | 2021 | 9.21  | 1.70 | 1.45 | NA | NA   |
|                  | 2022 | 9.60  | 1.73 | 1.65 | NA | NA   |
|                  | 2023 | 10.05 | 1.77 | 1.84 | NA | NA   |
|                  | 2024 | 10.56 | 1.80 | 2.01 | NA | NA   |

|                 |      |       |      |      |      |    |
|-----------------|------|-------|------|------|------|----|
|                 | 2025 | 10.25 | 1.55 | 1.82 | NA   | NA |
|                 | 2026 | 10.63 | 1.58 | 2.02 | NA   | NA |
|                 | 2027 | 11.08 | 1.62 | 2.20 | NA   | NA |
|                 | 2028 | 11.60 | 1.65 | 2.38 | NA   | NA |
|                 | 2029 | 11.29 | 1.40 | 2.18 | NA   | NA |
|                 | 2030 | 11.67 | 1.43 | 2.38 | NA   | NA |
|                 | 2031 | 12.12 | 1.47 | 2.57 | NA   | NA |
|                 | 2032 | 12.63 | 1.50 | 2.74 | NA   | NA |
|                 | 2033 | 12.32 | 1.25 | 2.55 | NA   | NA |
|                 | 2034 | 12.71 | 1.28 | 2.74 | NA   | NA |
|                 | 2035 | 13.16 | 1.32 | 2.93 | NA   | NA |
|                 | 2036 | 13.67 | 1.35 | 3.10 | NA   | NA |
|                 | 2037 | 13.36 | 1.10 | 2.91 | NA   | NA |
|                 | 2038 | 13.74 | 1.13 | 3.11 | NA   | NA |
|                 | 2039 | 14.19 | 1.16 | 3.29 | NA   | NA |
|                 | 2040 | 14.71 | 1.20 | 3.47 | NA   | NA |
| NH-Asians       |      |       |      |      |      |    |
| <b>Observed</b> | 2006 | 8.38  | 1.05 | NA   | 1.26 | NA |
|                 | 2007 | 7.65  | 0.99 | NA   | 1.46 | NA |
|                 | 2008 | 8.38  | 1.44 | NA   | 1.32 | NA |
|                 | 2009 | 8.33  | 1.37 | NA   | 1.51 | NA |
|                 | 2010 | 8.34  | 1.26 | 0.13 | 1.91 | NA |
|                 | 2011 | 7.80  | 1.18 | 0.15 | 1.55 | NA |
|                 | 2012 | 7.58  | 1.36 | 0.16 | 1.60 | NA |
|                 | 2013 | 7.19  | 1.08 | 0.11 | 1.50 | NA |
|                 | 2014 | 6.84  | 0.99 | 0.14 | 1.46 | NA |
|                 | 2015 | 6.78  | 1.09 | 0.09 | 1.22 | NA |

|                  |      |      |      |      |      |    |
|------------------|------|------|------|------|------|----|
|                  | 2016 | 6.84 | 0.80 | 0.19 | 1.30 | NA |
|                  | 2017 | 6.64 | 0.84 | 0.14 | 1.28 | NA |
|                  | 2018 | 6.50 | 0.78 | 0.18 | 0.99 | NA |
|                  | 2019 | 6.33 | 0.80 | 0.21 | 1.05 | NA |
|                  | 2020 | 6.45 | 0.61 | 0.22 | 1.08 | NA |
| <b>Projected</b> | 2021 | 6.09 | 0.61 | 0.17 | 1.16 | NA |
|                  | 2022 | 5.83 | 0.53 | 0.19 | 1.10 | NA |
|                  | 2023 | 5.67 | 0.45 | 0.22 | 1.04 | NA |
|                  | 2024 | 5.62 | 0.34 | 0.24 | 0.99 | NA |
|                  | 2025 | 5.44 | 0.33 | 0.20 | 1.04 | NA |
|                  | 2026 | 5.18 | 0.26 | 0.22 | 0.98 | NA |
|                  | 2027 | 5.02 | 0.17 | 0.24 | 0.92 | NA |
|                  | 2028 | 4.97 | 0.07 | 0.27 | 0.87 | NA |
|                  | 2029 | 4.79 | 0.06 | 0.22 | 0.92 | NA |
|                  | 2030 | 4.53 | -    | 0.25 | 0.85 | NA |
|                  | 2031 | 4.38 | -    | 0.27 | 0.80 | NA |
|                  | 2032 | 4.33 | -    | 0.29 | 0.74 | NA |
|                  | 2033 | 4.15 | -    | 0.25 | 0.79 | NA |
|                  | 2034 | 3.89 | -    | 0.27 | 0.73 | NA |
|                  | 2035 | 3.73 | -    | 0.30 | 0.67 | NA |
|                  | 2036 | 3.68 | -    | 0.32 | 0.62 | NA |
|                  | 2037 | 3.50 | -    | 0.28 | 0.67 | NA |
|                  | 2038 | 3.24 | -    | 0.30 | 0.60 | NA |
|                  | 2039 | 3.08 | -    | 0.32 | 0.55 | NA |
|                  | 2040 | 3.03 | -    | 0.34 | 0.49 | NA |
| <b>NH-Blacks</b> |      |      |      |      |      |    |
| <b>Observed</b>  | 2006 | 5.44 | 1.28 | 0.07 | 0.20 | NA |

|                  |      |      |      |      |      |    |
|------------------|------|------|------|------|------|----|
|                  | 2007 | 5.36 | 1.50 | 0.18 | 0.22 | NA |
|                  | 2008 | 5.73 | 1.63 | 0.22 | 0.24 | NA |
|                  | 2009 | 6.32 | 1.90 | 0.30 | 0.26 | NA |
|                  | 2010 | 6.22 | 1.96 | 0.28 | 0.25 | NA |
|                  | 2011 | 6.37 | 2.08 | 0.28 | 0.21 | NA |
|                  | 2012 | 6.37 | 2.10 | 0.29 | 0.24 | NA |
|                  | 2013 | 6.51 | 2.23 | 0.31 | 0.27 | NA |
|                  | 2014 | 6.28 | 2.14 | 0.34 | 0.23 | NA |
|                  | 2015 | 6.24 | 2.11 | 0.26 | 0.23 | NA |
|                  | 2016 | 6.99 | 2.31 | 0.39 | 0.18 | NA |
|                  | 2017 | 6.76 | 2.12 | 0.45 | 0.22 | NA |
|                  | 2018 | 6.85 | 1.94 | 0.45 | 0.24 | NA |
|                  | 2019 | 6.68 | 1.74 | 0.42 | 0.23 | NA |
|                  | 2020 | 6.41 | 1.67 | 0.39 | 0.22 | NA |
| <b>Projected</b> | 2021 | 7.18 | 1.61 | 0.51 | 0.24 | NA |
|                  | 2022 | 7.09 | 1.44 | 0.51 | 0.23 | NA |
|                  | 2023 | 7.09 | 1.32 | 0.51 | 0.22 | NA |
|                  | 2024 | 7.19 | 1.23 | 0.52 | 0.21 | NA |
|                  | 2025 | 7.53 | 1.14 | 0.59 | 0.24 | NA |
|                  | 2026 | 7.43 | 0.98 | 0.59 | 0.23 | NA |
|                  | 2027 | 7.44 | 0.85 | 0.60 | 0.22 | NA |
|                  | 2028 | 7.54 | 0.76 | 0.61 | 0.21 | NA |
|                  | 2029 | 7.87 | 0.67 | 0.67 | 0.24 | NA |
|                  | 2030 | 7.78 | 0.51 | 0.68 | 0.23 | NA |
|                  | 2031 | 7.79 | 0.38 | 0.68 | 0.22 | NA |
|                  | 2032 | 7.89 | 0.30 | 0.69 | 0.21 | NA |
|                  | 2033 | 8.22 | 0.20 | 0.76 | 0.24 | NA |

|                  |      |      |      |      |      |      |
|------------------|------|------|------|------|------|------|
|                  | 2034 | 8.13 | 0.04 | 0.76 | 0.23 | NA   |
|                  | 2035 | 8.13 | -    | 0.77 | 0.22 | NA   |
|                  | 2036 | 8.24 | -    | 0.78 | 0.21 | NA   |
|                  | 2037 | 8.57 | -    | 0.84 | 0.24 | NA   |
|                  | 2038 | 8.47 | -    | 0.85 | 0.22 | NA   |
|                  | 2039 | 8.48 | -    | 0.85 | 0.21 | NA   |
|                  | 2040 | 8.58 | -    | 0.86 | 0.21 | NA   |
| <b>NH-Whites</b> |      |      |      |      |      |      |
| <b>Observed</b>  | 2006 | 2.91 | 0.44 | 0.08 | 0.05 | 0.01 |
|                  | 2007 | 3.02 | 0.57 | 0.15 | 0.05 | 0.01 |
|                  | 2008 | 3.15 | 0.63 | 0.19 | 0.05 | 0.02 |
|                  | 2009 | 3.24 | 0.68 | 0.17 | 0.06 | 0.02 |
|                  | 2010 | 3.36 | 0.69 | 0.22 | 0.05 | 0.02 |
|                  | 2011 | 3.47 | 0.74 | 0.21 | 0.06 | 0.02 |
|                  | 2012 | 3.44 | 0.83 | 0.24 | 0.03 | 0.03 |
|                  | 2013 | 3.53 | 0.86 | 0.21 | 0.06 | 0.04 |
|                  | 2014 | 3.59 | 0.88 | 0.27 | 0.03 | 0.03 |
|                  | 2015 | 3.70 | 0.92 | 0.28 | 0.05 | 0.05 |
|                  | 2016 | 3.89 | 0.85 | 0.32 | 0.03 | 0.07 |
|                  | 2017 | 4.01 | 0.86 | 0.32 | 0.03 | 0.07 |
|                  | 2018 | 4.00 | 0.77 | 0.36 | 0.03 | 0.08 |
|                  | 2019 | 4.08 | 0.76 | 0.36 | 0.04 | 0.09 |
|                  | 2020 | 4.19 | 0.72 | 0.38 | 0.03 | 0.12 |
| <b>Projected</b> | 2021 | 4.30 | 0.77 | 0.39 | 0.04 | 0.13 |
|                  | 2022 | 4.36 | 0.74 | 0.41 | 0.03 | 0.13 |
|                  | 2023 | 4.45 | 0.71 | 0.44 | 0.04 | 0.14 |
|                  | 2024 | 4.56 | 0.68 | 0.46 | 0.03 | 0.15 |

|  |      |      |      |      |      |      |
|--|------|------|------|------|------|------|
|  | 2025 | 4.65 | 0.73 | 0.46 | 0.04 | 0.16 |
|  | 2026 | 4.72 | 0.70 | 0.49 | 0.03 | 0.17 |
|  | 2027 | 4.80 | 0.67 | 0.51 | 0.04 | 0.17 |
|  | 2028 | 4.91 | 0.64 | 0.54 | 0.03 | 0.18 |
|  | 2029 | 5.01 | 0.69 | 0.53 | 0.04 | 0.19 |
|  | 2030 | 5.07 | 0.66 | 0.56 | 0.03 | 0.20 |
|  | 2031 | 5.16 | 0.63 | 0.59 | 0.04 | 0.20 |
|  | 2032 | 5.27 | 0.60 | 0.61 | 0.03 | 0.21 |
|  | 2033 | 5.36 | 0.65 | 0.61 | 0.04 | 0.22 |
|  | 2034 | 5.42 | 0.62 | 0.63 | 0.03 | 0.23 |
|  | 2035 | 5.51 | 0.59 | 0.66 | 0.04 | 0.24 |
|  | 2036 | 5.62 | 0.56 | 0.69 | 0.04 | 0.24 |
|  | 2037 | 5.71 | 0.61 | 0.68 | 0.04 | 0.25 |
|  | 2038 | 5.78 | 0.58 | 0.71 | 0.04 | 0.26 |
|  | 2039 | 5.87 | 0.55 | 0.73 | 0.04 | 0.27 |
|  | 2040 | 5.97 | 0.52 | 0.76 | 0.04 | 0.28 |

\*:The projections of overall, sex and age group are based on data from 2015 to 2022, the projections by race and ethnicity are based on data from 2015 to 2020.

Note: ALD, alcohol-associated liver disease; MASLD, metabolic dysfunction-associated steatotic liver disease; HCV, hepatitis C virus; HBV, hepatitis B virus

**eFigure.** Causes of Deaths Related to Hepatocellular Carcinoma (HCC) Presented by the Age-Standardized Mortality Rate (ASMR) per 100 000 and Predicted Value to 2040, Overall and by Race and Ethnicity

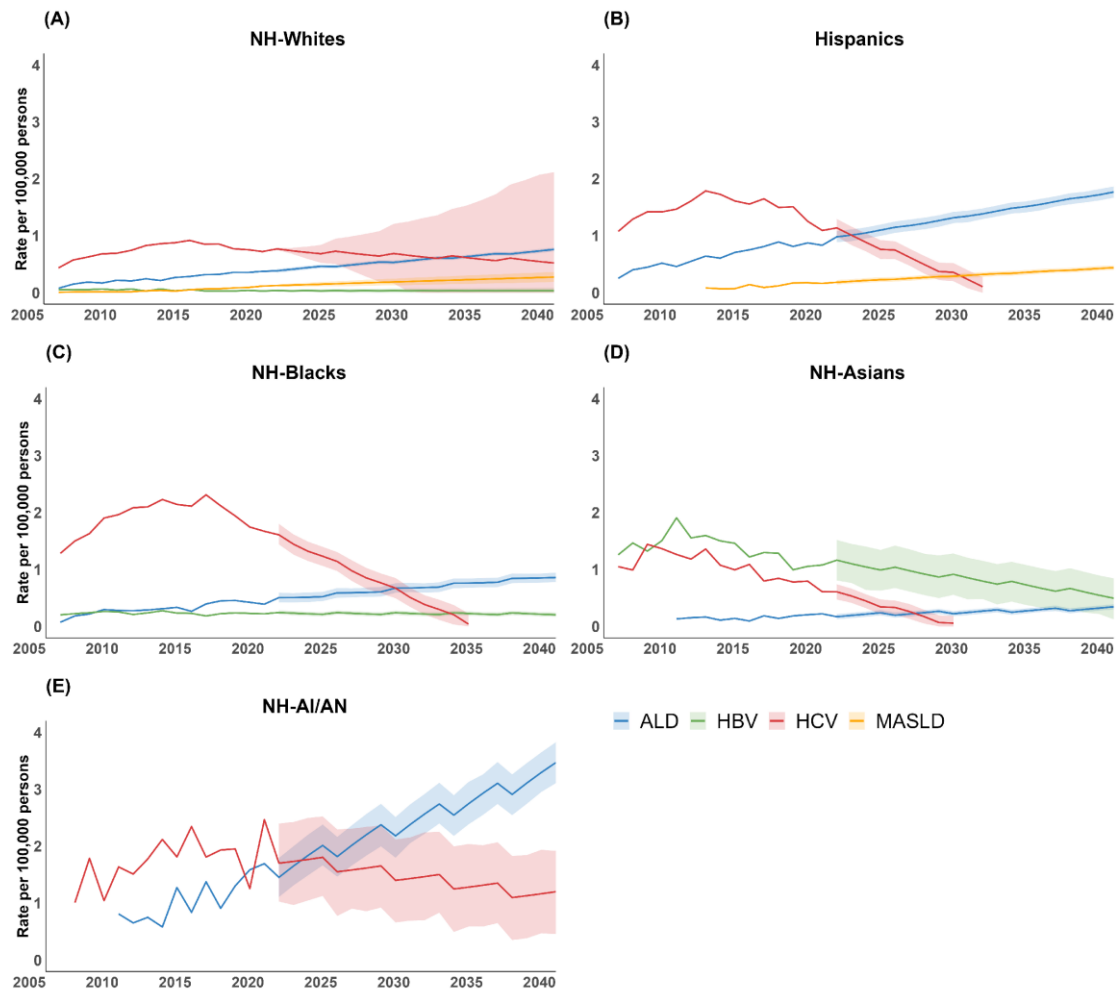

Note: The hepatitis C virus (HCV) group is projected to 2040 based on data from 2015 to 2020. The other groups are projected to 2040 based on data from 2006 to 2020. ALD, alcohol-associated liver disease; MASLD, metabolic dysfunction-associated steatotic liver disease; HCV, hepatitis C virus; HBV, hepatitis B virus
