# Supplementary material for: Trends in Hepatocellular Carcinoma Mortality Rates in the US and Projections Through 2040
Source: PubMed Central journal article supplement (PMC11574689; doi:10.1001/jamanetworkopen.2024.45525), 2024-11-18
Supplement: jamanetwopen-e2445525-s002.pdf [file jamanetwopen-e2445525-s002.pdf]

## Data Sharing Statement

Qiu. Trends in Hepatocellular Carcinoma Mortality Rates in the US and Projections Through 2040. *JAMA Netw Open*. Published November 18, 2024.

doi:10.1001/jamanetworkopen.2024.45525

### Data

**Data available:** The NVSS can be accessed through this website:

<https://wonder.cdc.gov/mcd.html>.
